# Supplementary material for: Depletion of VGLL4 Causes Perinatal Lethality without Affecting Myocardial Development
Source: MDPI journal article supplement (doi:10.3390/cells11182832), 2022-09-10
Supplement: s1 [file s1]

## Article

# Depletion of VGLL4 Causes Perinatal Lethality without Affecting Myocardial Development

Caroline Sheldon <sup>1</sup>, Aaron Farley <sup>1,2</sup>, Qing Ma <sup>3</sup>, William T. Pu <sup>3</sup> and Zhiqiang Lin <sup>1,\*</sup><sup>1</sup> Masonic Medical Research Institute, 2150 Bleecker St., Utica, NY 13501, USA<sup>2</sup> Biology and Chemistry Department, SUNY Polytechnic Institute, 100 Seymour Rd., Utica, NY 13502, USA<sup>3</sup> Department of Cardiology, Boston Children's Hospital, 300 Longwood Ave, Boston, MA 02115, USA

\* Correspondence: zlin@mmri.edu

## Expanded material and experimental procedures

### *Crispr-sgRNA mediated germ line mutation*

Cas9 mRNA and gRNA were injected into the pronuclei of fertilized embryos, which were then transplanted into pseudopregnant mice. Two guide RNAs were used to cause deletion in the coding region of *Vgll4* TDU domain: 5'-gaaattaatacagactcactatagGCTCCTTGTAAGTTCTTGCCCgttttagagctagaaatagc-3' and 5'-gaaattaatacagactcactataggCCATGTGTACCTAGTGCTTgttttagagctagaaatagc-3'. F0 offsprings were screened for mutations with PCR, and the mutant carrying the largest deletion (46 bp deletion) was crossed to wild type mice to generate F1 pups.

### *Vgll4 flox targeting vector construction*

pCMV plasmid was used as a backbone to generate *Vgll4* flox targeting vector. Briefly, the PCR products of the left and right recombination arms were cloned into pCMV with EcoRI+KpnI and SalI +NheI respectively, to generate pCMV-*Vgll4*-L-R. Floxed *Vgll4* exon 5 coding sequence was then cloned into the pCMV-*Vgll4*-L-R vector using KpnI+SalI restriction enzyme set. At last, Neomycin resistant cassette flanked with FRT sequences was placed between the right side LoxP site and the right recombination arm. At 5 prime site of the right recombination arm, one A>G mutation was introduced to destroy guide RNA PAM sequence.

### *Primary antibody used in this study.*

VGLL4 polyclonal antibody was generated by Custom Antibody Service (YenZym, LLC), and a peptide containing 14 residues (HFRRSLGKNYKEPE, identical between mouse and human) was used as antigen to immunize rabbit. The elicited antibody was affinity-purified against the same peptide used for immunization. TNNT3 antibody (Santa Cruz, sc-365446), GAPDH (Sigma-Aldrich, G8795), YAP antibody (Protein Tech, 13584-I-AP), TEAD1 antibody (BD, 610923) for Co-IP, TEAD1 antibody (CST, 12292S), for Western blot.

### *Adult cardiomyocytes isolation*

Adult Ventricular myocytes were isolated from 6–8 week old mice following a previously described method [1]. For cardiomyocyte dimension measurements, adult cardiomyocytes were first fixed with 4% PFA and then imaged with Keyence BZ-X800 microscope. For protein and RNA isolation, adult cardiomyocytes were lysed with RIPA buffer and Trizol reagent, respectively.

### ***Echocardiography (Echo) measurements.***

Echocardiography measurements were performed with a VisualSonics Vevo 3100 ultrasound imaging system. For adult mice, before being tested, the mouse chest was depilated and the mice were trained for echo for three consecutive days. Briefly, the mice were held in a position to expose the chest, and an artificial plastic probe was put onto the chest to mimic the action of the ultrasound probe. On the third day, conscious mice were subjected to Echo measurements.

### ***Histology and immunostaining***

For cryosection, hearts were fixed in 4% PFA, cryoprotected with 30% sucrose, and embedded in OCT. For embryo serial section, E16.5 embryos were dehydrated and embedded in paraffin. Hematoxylin and eosin (H&E) staining was performed on paraffin-embedded sections. Immunostaining was performed on cryosections and detected with Alexa-labelled secondary antibodies. EdU was administered intraperitoneally at 200 µg/animal (pregnant dams), 2 hours before tissue collection. EdU was detected with Click-iT chemistry (Invitrogen). TNNI3 antibody was used to visualize cardiomyocytes. Imaging was performed on a Keyence BZ-X800 microscopy system or a Zeiss LSM-700 confocal microscope.

### **Reference**

[1] O'Connell, T.D., Rodrigo, M.C. and Simpson, P.C. (2007) Isolation and culture of adult mouse cardiac myocytes. *Methods Mol Biol* **357**, 271-296.

**Supplemental Table S1.** Primers used in this study.

| Primer Name                    | DNA Oligo Sequence (5'–3')     |
|--------------------------------|--------------------------------|
| Pr-623                         | GGAATAAGACTGTCAACGGAGACT       |
| Pr-624                         | TCCTACAGAAAATATAGGGGCCTG       |
| Pr-900                         | AGCGTTGGCTACCCGTGATATTGCTGAAGA |
| Pr-901                         | CAGGTCGGTCTTGACAAAAAGAAC       |
| Pr-705                         | TAGAGCACGTGTGCACCTTGAGTTGGC    |
| Pr-706                         | CCGTGCTGTTCTGTTGCCACAC         |
| Vgll4 qRT-PCR TDU1 Forward     | ACTGCCACCTGTGACCCTGTGGT        |
| Vgll4 qRT-PCR TDU1 Reverse     | CTGCTTTGATCTGAAGCCATGTGTC      |
| Vgll4 qRT-PCR 5 prime Forward  | ATGAACAACAATATCGGCGTTCT        |
| Vgll4 qRT-PCR 5 prime reverse  | GGGCTCCATGCTGAATTTCC           |
| CycB1 qRT-PCR Forward          | AAGGTGCCTGTGTGTGAACC           |
| CycB1 qRT-PCR Reverse          | GTCAGCCCCATCATCTGCG            |
| Cdk1 qRT-PCR Forward           | TTTCGGCCTTGCCAGAGCGTT          |
| Cdk1 qRT-PCR Reverse           | GTGGAGTAGCGAGCCGAGCC           |
| Igf1r qRT-PCR Forward          | CTTTGCGAGAACCATGCCAG           |
| Igf1r qRT-PCR Reverse          | TAGACGGTTGAGTTTGGCCC           |
| Ccn2 (Ctcf) qRT-PCR Forward    | CAAGGACCCGCACAGCAGTT           |
| Ccn2 (Ctcf)qRT-PCR Reverse     | AGAACAGGCGCTCCACTCTG           |
| Ccn1(Cyr61) qRT-PCR Forward    | GCTCAGTCAGAAGGCAGACC           |
| Ccn1(Cyr61) qRT-PCR Reverse    | GTTCTTGGGGACACAGAGGA           |
| Birc 2 qRT-PCR Forward         | ACTTCAGACACCCCAGGAGAAGAAA      |
| Birc 2 qRT-PCR Reverse         | CCGCTGAACCGTCTGTCTCACC         |
| Vgll4 NM_177683.3 Forward      | CCGAATAGAAGACACAATCAGACACC     |
| Vgll4 NM_177683.3 reverse      | CTCCTAAACTTCAGGAAGACAGAGG      |
| Vgll4x4 XM_006506014.4 Forward | TTGGCAATGATTAAAGTGAG           |
| Vgll4x4 XM_006506014.4 Reverse | TGTGTCACTGCTGTTCTTAGTCAG       |
| Vgll4x3 XM_006506013.5 Forward | GACAGACTCGAAGGGATTCTAGAATC     |
| Vgll4x3 XM_006506013.5 Reverse | CTGTGGAGAGTGTCAATACAGCTATG     |
| Vgll4x1 XM_006506010.3 Forward | CTCTGAGTGTCTTATCCCAGACTG       |
| Vgll4x1 XM_006506010.3 Reverse | GAGGGAAGCTTCACGTTTTTCATC       |

**Supplemental Table S2.** Summary of *Vgll4* transcript variants.

| Gene ID | Gene Symbol | Transcript     | Length (nt) | Protein        | Length (aa) | Protein name | Isoform | Organism     |
|---------|-------------|----------------|-------------|----------------|-------------|--------------|---------|--------------|
| 232334  | Vgll4       | XM_006506010.3 | 3324        | XP_006506073.1 | 281         | VGLL4        | X1      | Mus musculus |
| 232334  | Vgll4       | XM_036166060.1 | 2979        | XP_036021953.1 | 250         | VGLL4        | X2      | Mus musculus |
| 232334  | Vgll4       | XM_006506012.3 | 2972        | XP_006506075.1 | 250         | VGLL4        | X2      | Mus musculus |
| 232334  | Vgll4       | XM_006506014.4 | 2869        | XP_006506077.1 | 201         | VGLL4        | X4      | Mus musculus |
| 232334  | Vgll4       | XM_006506013.5 | 12628       | XP_006506076.1 | 243         | VGLL4        | X3      | Mus musculus |
| 232334  | Vgll4       | NM_001356371.1 | 2739        | NP_001343300.1 | 281         | VGLL4        | 2       | Mus musculus |
| 232334  | Vgll4       | NM_177683.3    | 2824        | NP_808351.1    | 287         | VGLL4        | 1       | Mus musculus |

**Supplemental Figure S1.** DNA sequence alignment displaying *Vgll4* d46 indel mutation. DNA sequence alignment between wild type *Vgll4* (NM\_177683.3) and *Vgll4* d46 allele. DNA sequence covering the mutated region was included in this alignment.

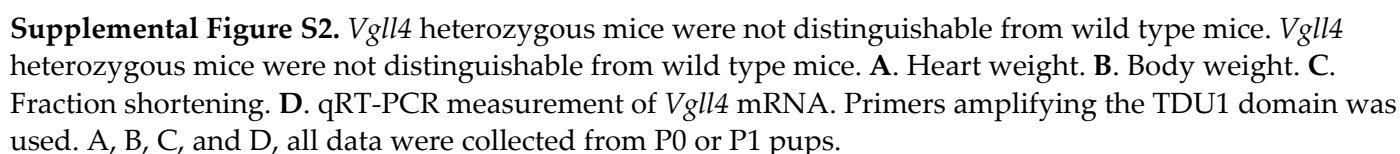

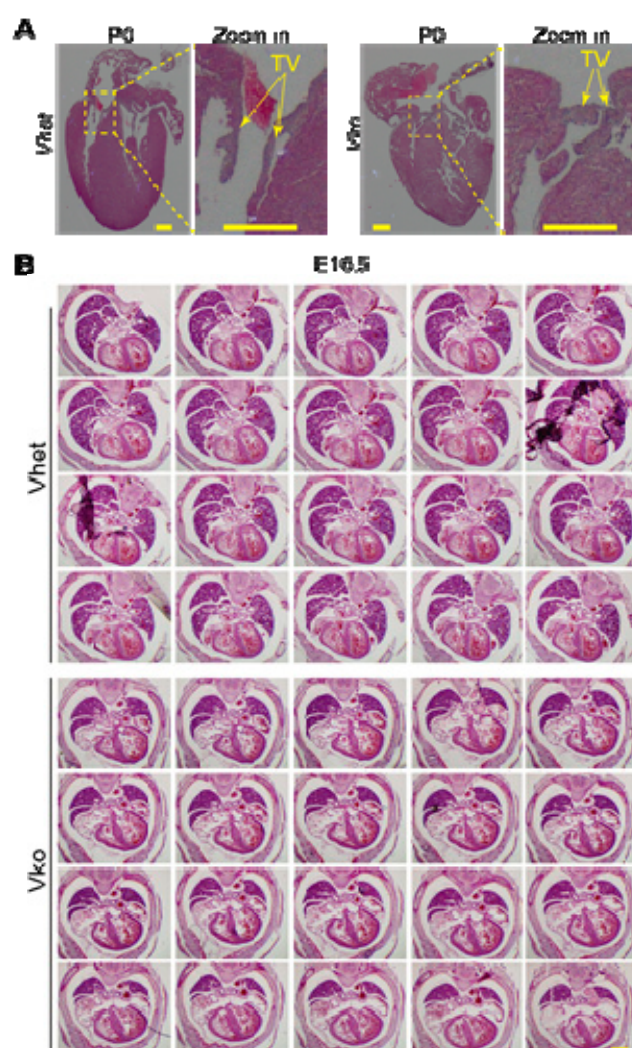

**Supplemental Figure S3.** Histology of the embryonic and neonatal *Vko* hearts. **A.** H&E stained P0 heart sections. Scale bar = 1 mm. TV, tricuspid valve. **B.** Serial section images of E16.5 hearts. Scale bar = 1 mm.

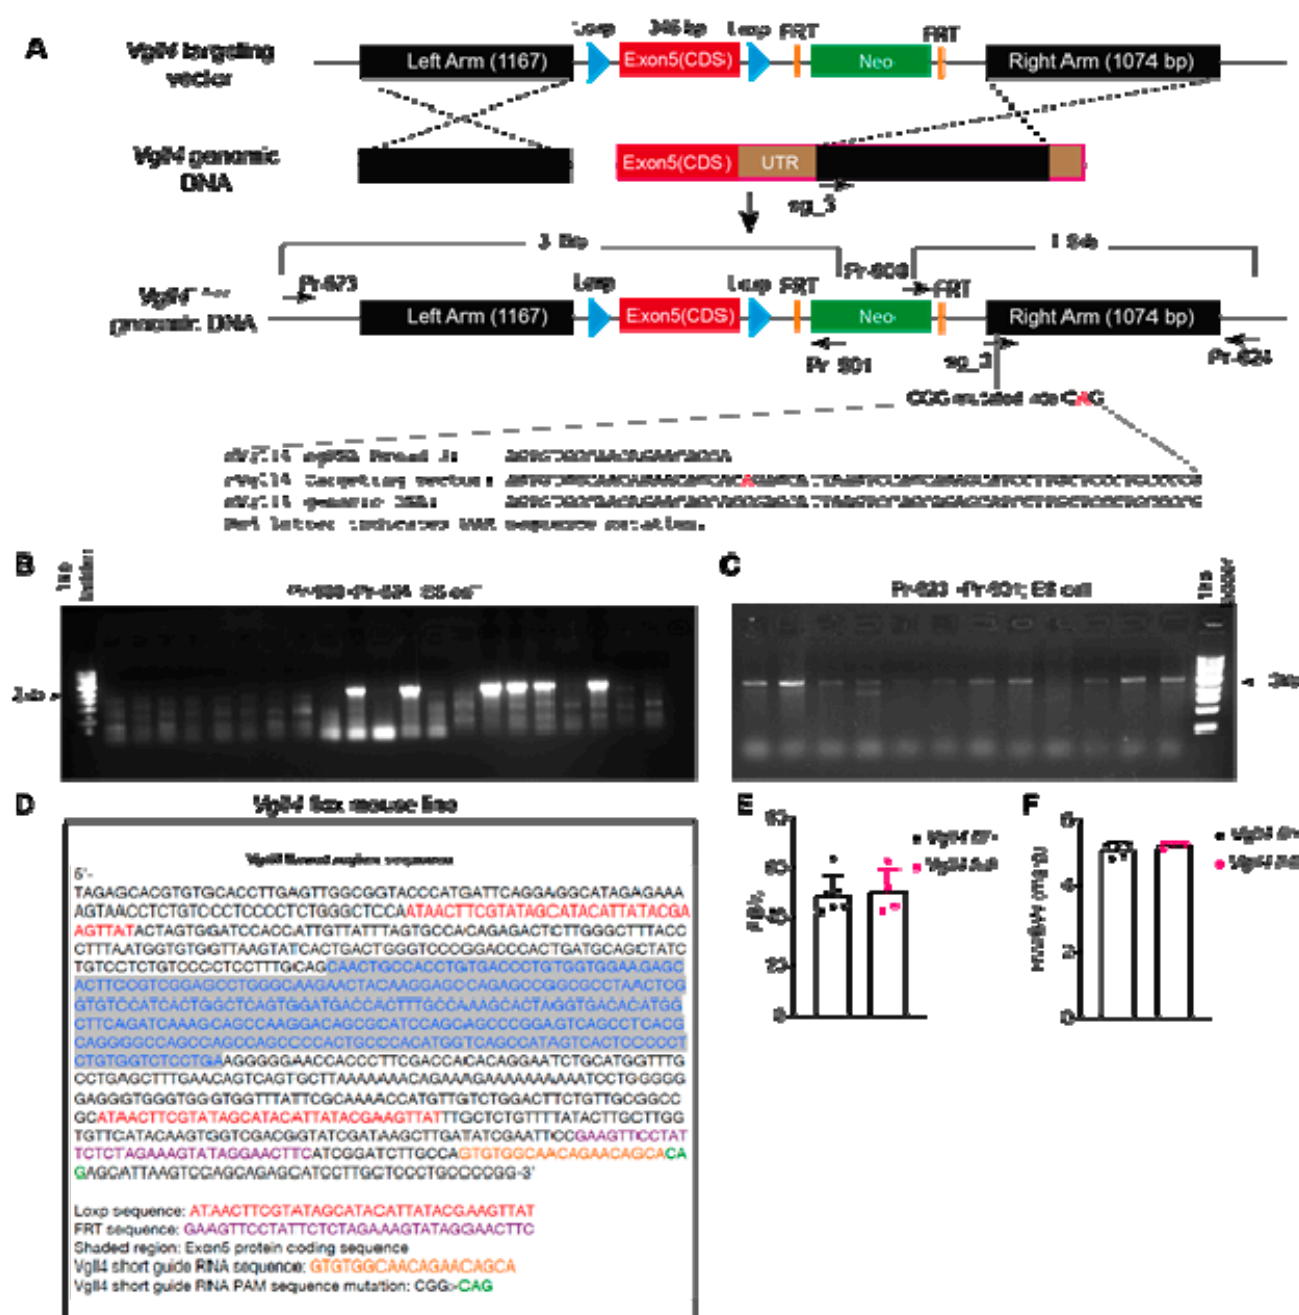

**Supplemental Figure S4.** Generation and validation of the *Vgll4* flox allele. **A.** *Vgll4* genome targeting strategy. The left and right recombination arms target *Vgll4* intron 4 and exon 5 untranslated region, respectively. A PGK::Neomycin selection cassette flanked by FRT sites was used for selection of recombinants, and *Vgll4* protein coding sequence (CDS) in exon 5 was flanked by LoxP sites. In the *Vgll4* flox genomic DNA diagram, the relative positions of primers and short guidance (sg) RNA sequence were labeled, and the PCR products sizes were indicated. Red letter indicates mutated PAM sequence. **B,C.** PCR screen of targeted mouse embryonic stem (ES) cells. The first round of PCR screen was performed with Pr-900+Pr-624 primer set (B), and the positive clones were further confirmed with pr-623+pr-901 PCR screen (C). **D.** Sequencing result of the *Vgll4* floxed region. Genomic DNA from *Vgll4*<sup>fl/fl</sup> mouse was sequenced to confirm the right insertion of LoxP sequences and the successful removal of Neomycin resistant cassette. **E.** Fraction shortening (FS%) and **F.** Heart to body weight ratio.

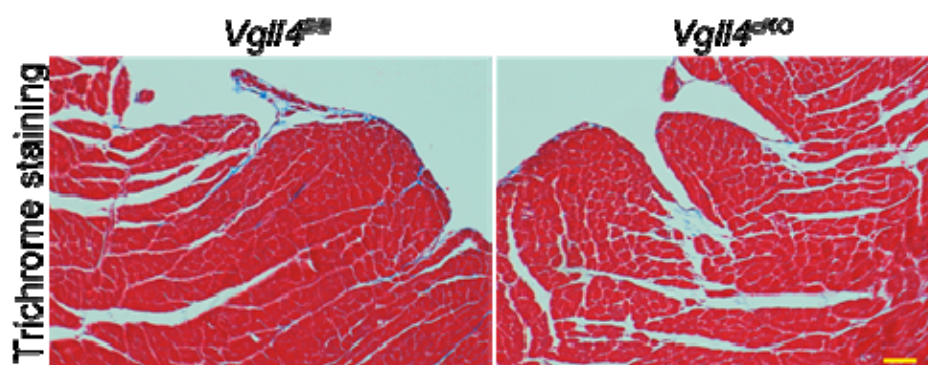

**Supplemental Figure S5.** Adult myocardium fibrosis analysis. Trichrome staining of adult myocardium. Scale bar = 50  $\mu$ m.

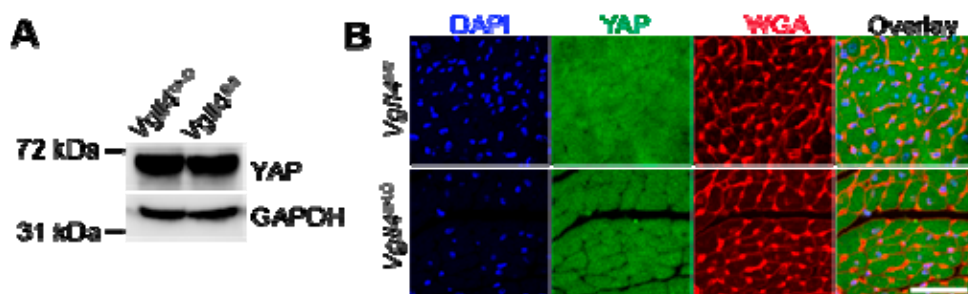

**Supplemental Figure S6.** Cardiomyocyte-specific depletion of VGLL4 does not change YAP expression and sub-cellular localization. **A.** YAP western blot. Total proteins from heart lysates were used for western blot. GAPDH was used as loading control. **B.** Immunofluorescence images of YAP antibody-stained adult myocardium. Wheat germ agglutinin (WGA) was used for visualizing plasma membrane. Scale bar = 50  $\mu$ m.
